# Supplementary material for: Transcriptional Regulation of Carbohydrate Metabolism in the Human Pathogen Candida albicans
Source: PubMed Central journal article supplement (PMC2749448; doi:10.1371/journal.ppat.1000612), 2009-10-09

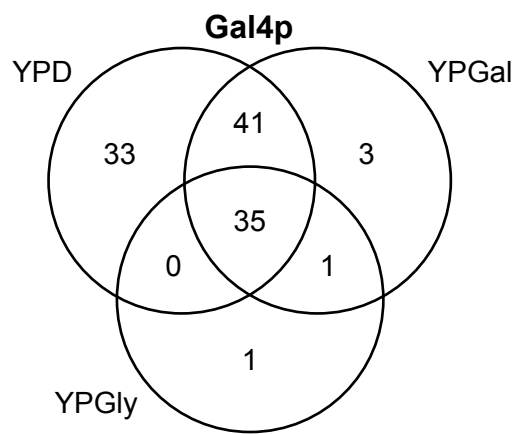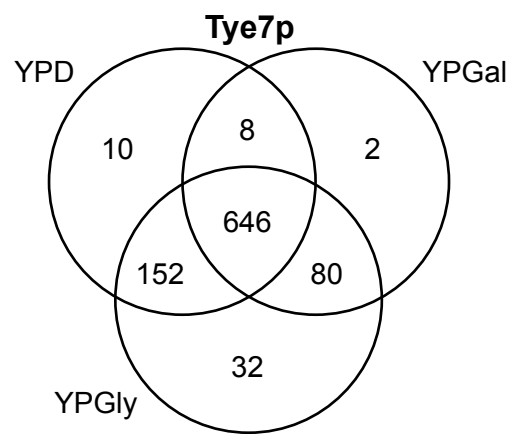

Supplement: ppat.1000612.s002.pdf [file ppat.1000612.s002.pdf]
