# Supplementary material for: Transcriptional Regulation of Carbohydrate Metabolism in the Human Pathogen Candida albicans
Source: PLoS Pathog. 2009 Oct 9;5(10):e1000612. doi: 10.1371/journal.ppat.1000612 (PMC2749448; doi:10.1371/journal.ppat.1000612)
Supplement: Table S6 — ChIP-CHIP binding enrichments of selected metabolic genes under different carbon sources. (0.03 MB XLS) [file ppat.1000612.s012.xls]

## Sheet: Table S6
Table S6. ChIP-CHIP binding enrichments of selected metabolic genes under different carbon sources
Name	Systematic	Gal4p YPD	Gal4p YPGal	Gal4p YPGly	Tye7p YPD	Tye7p YPGal	Tye7p YPGly
Glycolysis
HXK2	orf19.542	2.3	1.4	1	3.8	6	6.4
PGI1	orf19.3888	1.7	1	1	1.7	2.3	1.7
PFK1	orf19.3967	2.1	2	1.2	4.2	6.5	7.4
PFK2	orf19.6540	1.7	1.2	1	4.5	6.6	11.1
FBA1	orf19.4618	1.8	1.5	1.2	7.1	4	6.7
FBA1	orf19.4618	1.7	1.6	1.1	2.4	2.7	3.9
TPI1	orf19.6745	3	2.3	1.5	4.5	2.8	6
TDH3	orf19.6814	4.7	3	1.7	3.5	3.5	3.1
PGK1	orf19.3651	3.2	2	1.3	4.4	7.1	7
PGK1	orf19.3651	2.5	1.4	1.2	2.3	3	2.9
GPM1	orf19.903	3.2	1.6	1.5	3.6	3.9	6.3
ENO1	orf19.395	5.8	3.3	2	5.3	4.9	4.3
ENO1	orf19.395	4	1.7	1.4	3.5	3.4	2.6
CDC19	orf19.3575	6.6	4.3	3.1	4	4.1	6.8
PFK26-1	orf19.4753	1.1	1	1	1	1	1.1
Gluconeogenesis
FBP1	orf19.6178	1.1	1.1	1	1	1	1
PCK1	orf19.7514	1	1	1	1.1	1.3	1.9
PYC2	orf19.789	1.2	1.5	1	1	1	1.7
Fermentation
NDE1	orf19.339	2.9	1.9	1.2	3.7	5.3	5.4
PDC11	orf19.2877	2.8	1.3	1.1	2.5	3.3	3.9
ADH1	orf19.3997	1.2	1.06	1.05	3.4	3.65	2.9
ADH2	orf19.5113	1.2	1	1	1	1.1	1
ADH5	orf19.2608	1.1	1	1.1	1.5	3.3	4.3
ALD5	orf19.5806	1.3	1	1	1	1.1	1
ALD6	orf19.742	1.1	1	1	1.1	1.4	1.3
Pyruvate Dehydrogenase Complex
PDB1	orf19.5294	3.8	2.9	1.7	1	1.1	1
PDA1	orf19.3097	4	2.7	1.5	1	1	1
LAT1	orf19.6561	3.4	4.6	2.4	1.3	1.6	3
PDX1	orf19.5021	4.2	2	1.8	1.1	1.4	1.4
LPD1	orf19.6127	2	1.1	1.1	1	1	1
Trehalose Metabolism
TPS1	orf19.6640	1	1	1	2.3	2.9	2.9
TPS2	orf19.3038	1.4	1.1	1.1	1.6	2.9	4.3
TPS3	orf19.5348	1.1	1	1	3.5	3.3	2.3
NTH1	orf19.7479	1.2	1.3	1.1	1.3	2.4	4.1
ATC1	orf19.6214	1	1	1.1	1.2	1.6	1.5
TCA cycle
ACO2	orf19.6632	1	1	1	1.4	1.5	1
ACO1	orf19.6385	1.4	1	1	1	1	1.4
IDH1	orf19.4826	1.6	1.2	1.1	1.1	1.1	1.1
IDH2	orf19.5791	1	1	1	1	1	1
KGD1	orf19.6165	1.4	1.1	1	1	1	1.1
KGD2	orf19.6126	1	1	1	1	1	1
LSC1	orf19.3358	1	1.2	1	1	1	1
LSC2	orf19.1860	2.5	1.6	1.3	1	1.2	1.2
SDH1	orf19.440	1	1.3	1	1	1.3	1.3
SDH2	orf19.637	1	1	1	1	1	1
SDH4	orf19.4468	1	1	1	1	1	1
SDH6	orf19.1480	1.1	1	1.1	1.5	2.5	2.8
FUM1	orf19.543	1.1	1.2	1	1.2	1.5	2.1
FUM12	orf19.6724	1	1	1	1	1	1
MDH1-1	orf19.4602	1.3	1.1	1.1	1	1.5	1.4
MDH1	orf19.7481	1	1.1	1	1	1.4	3
Glycogen metabolism
GPH1	orf19.7021	1	1	1	1	1	1.4
GDB1	orf19.744	1.2	1.1	1	1.2	2.1	2.6
GSY1	orf19.3278	1.1	1	1	1	1.5	1.4
GLG1	orf19.3325	1	1	1	1	1	1
GLC3	orf19.5622	1	1	1.1	1	1	1
GLG2	orf19.7434	1	1.1	1	1	1	1
Glycerol metabolism
GPD1	orf19.1756	1	1	1	1	1	1
GPD2	orf19.691	1.4	1.3	1.1	1.3	1.2	1.2
GUT1	orf19.558	1.2	1	1.2	1.2	1.1	1
GPP1	orf19.5437	1	1	1.1	2.2	3.3	2.9
DAK2	orf19.4777	1.2	1.3	1.1	1.7	2.3	1.9
GUT2	orf19.3133	1	1.1	1.1	1	1.1	1
GCY1	orf19.6757	1.2	1	1	3.5	3.5	2.2
TYE7	orf19.4941	1.2	1.3	1	1.4	1.6	1.2
GAL4	orf19.5338	1.1	1	1	1	1.2	1.4
*A few genes in Figure 1 were considered to be directly activated by either Gal4p or Tye7p despite a low fold enrichment in the above table. The above table provides values for the single probe full-genome microarray that was used. In some cases, binding was detected with the tiling array (Dataset S1), primarily in cases where binding was in a different region in the promoter than the designed pr…
