# Supplementary material for: Transcriptional Regulation of Carbohydrate Metabolism in the Human Pathogen Candida albicans
Source: PLoS Pathog. 2009 Oct 9;5(10):e1000612. doi: 10.1371/journal.ppat.1000612 (PMC2749448; doi:10.1371/journal.ppat.1000612)
Supplement: Table S17 — Genes up-regulated in BWP17 strain in glucose hypoxic growth conditions. (0.05 MB XLS) [file ppat.1000612.s023.xls]

## Sheet: Table S17
Table S17. Genes up-regulated in BWP17 strain in glucose hypoxic growth conditions
(BWP17 hypoxia relative to BWP17 normoxia)
Systematic	Common Name	Fold Change	Description
orf19.1691		71.3335	hypothetical protein
orf19.3548.1	WHS11	19.5963	heat shock protein
orf19.5674	RBT8	18.7673	glycosyl-phosphatidylinositol protein
orf19.5636	RBT5	16.5925	GPI-anchored cell wall protein
orf19.2849	AQY1	10.8833	aquaporin
orf19.2371	GAG1	10.077	putative gag protein
orf19.5818	SUR2	8.60579	sphingosine hydroxylase
orf19.2372	POL99	7.12715	putative pol protein
orf19.7310	MSC1	6.95769	hypothetical protein
orf19.734	GLK1	6.85032	aldohexose specific glucokinase
orf19.2803	HEM13	6.08855	coprophyrinogen oxidase
orf19.4943	PSA2	4.69158	mannose-1-phosphate guanyltransferase
orf19.3822		4.59349	inositolphosphorylceramide-B C-26 hydroxylase
orf19.333	FCY21	4.56657	purine-cytosine permease
orf19.3997	ADH1	4.49024	alcohol dehydrogenase
orf19.6882	OSM1	4.3426	fumarate reductase flavoprotein subunit
orf19.7284	ASR2	4.18844	regulated by cAMP and osmotic stress
orf19.7404	CHA1	4.0947	L-serine/L-threonine deaminase
orf19.4255	PST1	3.98292	GPI-anchored protein
orf19.1802		3.87051	hypothetical protein
orf19.4048	DES1	3.67101	probable fatty acid desaturase
orf19.2248	ARE2	3.58647	acyl-CoA sterol acyltransferase
orf19.2451	PGA45	3.57554	putative GPI-anchor
orf19.2762	AHP1	3.54128	alkyl hydroperoxide reductase
orf19.4317	GRE3	3.52875	aldose reductase
orf19.2179	ARN1	3.4906	iron-siderophore transporter
orf19.395	ENO1	3.48414	enolase (glycolysis)
orf19.4777	DAK2	3.4351	dihydroxyacetone kinase
orf19.4390		3.36934	hypothetical protein
orf19.6745	TPI1	3.3413	triose phosphate isomerase
orf19.251		3.31893	ThiJ/PfpI protein family
orf19.3053		3.31464	hypothetical protein
orf19.1048	IFD1	3.20901	conserved aryl-alcohol dehydrogenase
orf19.4688	DAG7	3.20205	riboflavin aldehyde-forming enzyme
orf19.4013		3.19459	hypothetical protein
orf19.2020	HXT6	3.16889	hexose transporter
orf19.4756	YTP1	3.13394	hypothetical protein
orf19.744	GDB1	3.10162	glycogen debranching enzyme
orf19.1395		3.06014	mitochondrial phosphate carrier protein
orf19.4664		3.01203	hypothetical protein
orf19.5812		2.8924	hypothetical protein
orf19.5525		2.88079	hypothetical protein
orf19.7242	NCR1	2.82646	membrane protein
orf19.4600.1	DPM3	2.76445	dolichol-phosphate-mannose synthase
orf19.2959.1		2.74863	putative cation transporter
orf19.1442	PLB3	2.71312	phospholipase B (lysophospholipase)
orf19.1564		2.63194	hypothetical protein
orf19.4132	SN2	2.62106	hypothetical protein
orf19.6978		2.60066	hypothetical protein
orf19.1974	TFS1	2.5715	carboxypeptidase Y inhibitor
orf19.3656	COX15	2.57033	cytochrome oxidase assembly factor
orf19.1996	CHA2	2.52124	catabolic serine/threonine dehydratase
orf19.6640	TPS1	2.49724	trehalose-6-phosphate synthase
orf19.7021	GPH1	2.49416	glycogen phosphorylase
orf19.4358		2.49254	hypothetical protein
orf19.3442	OYE3	2.44964	NADPH dehydrogenase
orf19.7459		2.39259	putative chromatin factor
orf19.4845		2.39117	hypothetical protein
orf19.6602	FMP53	2.37148	hypothetical protein
orf19.2533.1	SBH1	2.34788	Sec61p-Sss1p-Sbh1p complex component
orf19.5686		2.34424	hypothetical protein
orf19.6293	EMP24	2.32549	member of the Gp24 protein family
orf19.4109	PMT4	2.31847	protein mannosyltransferase
orf19.955		2.31444	hypothetical protein
orf19.550	PDX3	2.30683	pyridoxine (pyridoxiamine) phosphate oxidase
orf19.2296		2.28302	hypothetical protein
orf19.3967	PFK1	2.28228	6-phosphofructokinase, alpha subunit
orf19.7166		2.27934	hypothetical protein
orf19.5102	PLB5	2.25909	phospholipase B3
orf19.6787	ERV14	2.23637	ER associated protein
orf19.6637		2.23215	predicted glycosilase
orf19.6065		2.23045	regulated by Mig1p and Tup1p
orf19.7348		2.21087	hypothetical protein
orf19.3433	OYE23	2.21051	NAPDH dehydrogenase
orf19.5417	DOT5	2.20701	derepressor of telomeric silencing
orf19.209	DFG10	2.15895	hypothetical protein
orf19.7625	KRE13	2.15246	KRE1 protein precursor
orf19.3803	MNN22	2.14983	Golgi alpha-1,2- mannosyltransferase
orf19.2227		2.11643	putative sulfate transporter
orf19.4477	IFD4	2.10261	aryl-alcohol dehydrogenase
orf19.7585	INO1	2.07329	myo-inositol-1- phosphate synthase
orf19.4738		2.07213	hypothetical protein
orf19.6816		2.06618	aldehyde reductase
orf19.2484		2.06106	hypothetical protein
orf19.3618	YWP1	2.05414	putative cell wall protein
orf19.4763		2.05398	hypothetical protein
orf19.778	PIL1	2.0388	echinocandin-binding protein
orf19.2328		2.02528	hypothetical protein
orf19.5103	PMU1	1.9945	phosphoglycerate mutase
orf19.223	KIN82	1.99073	serine/threonine protein kinase
orf19.405	VCX1	1.97047	vacuolar H+/Ca2+ exchanger
orf19.4082	DDR48	1.96906	flocculent specific protein
orf19.5971	YHV1	1.95669	hypothetical protein
orf19.3007.2		1.95649	hypothetical protein
orf19.3366	CSH3	1.95511	ER chaperone
orf19.6318		1.91898	hypothetical protein
orf19.1534	ZRT3	1.91684	vacuolar Zn-iron permease
orf19.7556		1.90917	hypothetical protein
orf19.301	PGA18	1.90333	putative GPI-anchor
orf19.4592	CGT1	1.89151	ceramide glucosyltransferase
orf19.4104		1.88838	hypothetical protein
orf19.6321	PGA48	1.86435	putative GPI-anchored protein
orf19.4595		1.8605	hypothetical protein
orf19.1563	ECM3	1.8524	membrane protein
orf19.5323	MDH3	1.85064	mitochondrial malate dehydrogenase
orf19.6971	DIE2	1.84874	glucosyltransferase
orf19.4816		1.83432	hypothetical protein
orf19.1149	ETR1	1.83118	mitochondrial 2-enoyl thioester reductase
orf19.4135	PRC2	1.82986	carboxypeptidase Y precursor
orf19.4879.2	NTF2	1.81945	nuclear transport factor
orf19.4466	ERF2	1.81018	hypothetical protein
orf19.6009	SET1	1.80484	histone methyltransferase
orf19.769		1.78554	polyol dehydrogenase
orf19.3462	SAR1	1.77792	GTP-binding protein of the ARF family
orf19.6976		1.77625	multidrug efflux protein
orf19.1035	WAR1	1.77151	putative transcription factor
orf19.4240	PER1	1.76295	involved in manganese homeostasis
orf19.7214		1.76172	glucan 1,3-beta-glucosidase
orf19.4581		1.75061	mannosyltransferase
orf19.2937	PMM1	1.74558	phosphomannomutase
orf19.6852		1.74343	hypothetical protein
orf19.5004	RAD54	1.73934	DNA-dependent ATPase
orf19.4185		1.73731	putative phosphatase
orf19.244	DCG1	1.7338	possible involvement in nitrogen metabolism
orf19.6220.3	MMD1	1.73057	maintenance of mitochondrial DNA
orf19.556		1.73015	regulated by Ssn6p
orf19.57	PSF2	1.72905	subunit of GINS complex
orf19.3322	DUT1	1.72762	dUTP pyrophosphatase
orf19.758	MRL1	1.72368	similar to mannose 6-phosphate receptor
orf19.1632	DCW2	1.72233	GPI-anchored protein with cell wall role
orf19.3679		1.72048	hypothetical protein
orf19.3052	YPT1	1.71479	GTP-binding protein of the rab family
orf19.5267		1.71394	putative cell wall protein
orf19.3427		1.71307	hypothetical protein
orf19.6492	PAK3	1.70551	ser/thr protein kinase
orf19.2672	NCP1	1.70436	NADPH-cytochrome P450 reductase
orf19.2885	PRI2	1.70294	DNA primase subunit
orf19.6928	SAP9	1.70068	secreted aspartyl proteinase 9
orf19.3394		1.69515	hypothetical protein
orf19.6860	PIS1	1.6904	phosphatidylinositol synthase
orf19.3228		1.68766	putative involvement in drug response
orf19.1880	HEM15	1.68648	ferrochelatase precursor
orf19.479.2	SEC22	1.6845	ER to Golgi protein transport synaptobrevin
orf19.7128	SYS1	1.67806	hypothetical protein
orf19.4328	CCC2	1.67755	copper-transporting ATPase
orf19.7531		1.67021	hypothetical protein
orf19.4616	POL30	1.66807	accessory factor for DNA polymerase delta
orf19.7554	SGE1	1.65678	suppressor of gal11 null
orf19.6739		1.65349	putative phosphomannomutase
orf19.4579	ERV29	1.64606	ER-Golgi transport vesicle protein
orf19.3879		1.64548	hypothetical protein
orf19.5683		1.6415	hypothetical protein
orf19.412	SSH1	1.64021	involved in co-translational pathway of protein transport
orf19.2756	ERD2	1.63964	HDEL receptor for ER protein retention
orf19.1676		1.63761	hypothetical protein
orf19.1028	ELA1	1.63466	transcriptional elongation factor
orf19.403	PCL2	1.6327	G1 cyclin
orf19.7325	SCO1	1.63204	inner mitochondrial membrane protein
orf19.7445	VID24	1.62787	peripheral vesicle membrane protein
orf19.876	PGA33	1.62772	putative GPI-anchored protein
orf19.3195	GAP3	1.62741	general amino acid permease
orf19.5242	CDC6	1.62678	cell cycle control protein
orf19.4377	KRE1	1.62226	cell wall beta-1,6-glucan assembly
orf19.1381	LSB5	1.61959	possible regulator of actin cytoskeletal organization
orf19.798	TAF14	1.61803	transcription initiation factor TFIIF small subunit
orf19.1474	SLA1	1.61513	involved in assembly of cortical actin cytoskeleton
orf19.6008		1.61391	hypothetical protein
orf19.1779	SCW10	1.60275	putative mannoprotein
orf19.5548	LYS14	1.60052	putative transcription factor
orf19.6540	PFK2	1.59339	beta subunit of phosphofructokinase
orf19.1999		1.59255	hypothetical protein
orf19.6993	GAP2	1.59064	general amino acid permease
orf19.5535	FEN2	1.59055	member of allantoate permease family
orf19.1482		1.58713	hypothetical protein
orf19.3859		1.58525	hypothetical protein
orf19.6704	LPF44	1.58435	hypothetical protein
orf19.4353	ULP1	1.58243	Ubl (ubiquitin-like protein) - specific protease
orf19.4234	CTR86	1.58221	hypothetical protein
orf19.3469		1.57884	hypothetical protein
orf19.4791		1.57822	hypothetical protein
orf19.3826		1.57133	hypothetical protein
orf19.1840		1.56874	hypothetical protein
orf19.2324	UBA4	1.56627	ubiquitin (URM1) activating enzyme
orf19.4090.1	VMA21	1.56542	involved in vacuolar H-ATPase assembly or function
orf19.2444	CHS7	1.56481	involved in chitin synthesis
orf19.3466		1.55614	SAM-dependent methyltransferase
orf19.3825	RCE1	1.5549	protease
orf19.7195	RAD6	1.54756	ubiquitin-protein ligase
orf19.1116		1.54691	hypothetical protein
orf19.2974	YKT6	1.54492	ER-Golgi transport
orf19.6261	BPH1	1.52705	probable transport protein
orf19.6757	GCY1	1.52667	possible involvement in drug response
orf19.2947	SNZ1	1.52609	stationary phase protein
orf19.4819		1.52449	hypothetical protein
orf19.156	FGR51	1.51339	involved in filamentous growth
orf19.689	PLB1	1.5117	lysophospholipase B
orf19.2209		1.51163	ion transport protein
orf19.4954	PPA1	1.51118	vacuolar ATPase V0 domain subunit c
orf19.5076	PFY1	1.50846	profilin
